# Supplementary material
Source: MDPI journal article supplement (https://www.mdpi.com/2071-1050/9/7/1199)
Supplement: s1 [file s1]

Supplementary Information:

**Table S1.** The confusion matrix of 2010 image classification and accuracy.

| Class types<br>determined<br>from<br>classified map | Class types determined from reference source |          |               |       |      |           |          |                     |                    |                    |                        |                |        | User's<br>Accuracy |
|-----------------------------------------------------|----------------------------------------------|----------|---------------|-------|------|-----------|----------|---------------------|--------------------|--------------------|------------------------|----------------|--------|--------------------|
|                                                     | Samples                                      | Woodland | Green<br>land | River | Lake | Reservoir | Farmland | Residential<br>land | Commercial<br>land | Industrial<br>land | Transportation<br>land | Public<br>land | Totals |                    |
|                                                     | Woodland                                     | 97       | 4             | 0     | 0    | 0         | 1        | 0                   | 0                  | 0                  | 0                      | 0              | 102    | 95%                |
|                                                     | Green land                                   | 2        | 85            | 0     | 0    | 0         | 2        | 0                   | 0                  | 0                  | 0                      | 0              | 89     | 96%                |
|                                                     | River                                        | 0        | 0             | 55    | 0    | 0         | 0        | 0                   | 0                  | 0                  | 0                      | 0              | 55     | 100%               |
|                                                     | Lake                                         | 0        | 0             | 0     | 35   | 0         | 0        | 0                   | 0                  | 0                  | 0                      | 0              | 35     | 100%               |
|                                                     | Reservoir                                    | 0        | 0             | 0     | 0    | 20        | 0        | 0                   | 0                  | 0                  | 0                      | 0              | 20     | 100%               |
|                                                     | Farmland                                     | 0        | 3             | 0     | 0    | 0         | 84       | 0                   | 0                  | 0                  | 0                      | 0              | 87     | 97%                |
|                                                     | Residential land                             | 0        | 0             | 0     | 0    | 0         | 0        | 122                 | 6                  | 1                  | 0                      | 1              | 130    | 94%                |
|                                                     | Commercial<br>land                           | 0        | 0             | 0     | 0    | 0         | 0        | 2                   | 92                 | 5                  | 0                      | 2              | 101    | 91%                |
|                                                     | Industrial land                              | 0        | 0             | 0     | 0    | 0         | 0        | 0                   | 3                  | 82                 | 3                      | 2              | 90     | 91%                |
|                                                     | Transportation<br>land                       | 0        | 0             | 0     | 0    | 0         | 0        | 0                   | 0                  | 0                  | 73                     | 1              | 74     | 99%                |
|                                                     | Public land                                  | 0        | 0             | 0     | 0    | 0         | 0        | 0                   | 1                  | 1                  | 0                      | 83             | 85     | 98%                |
|                                                     | Totals                                       | 99       | 92            | 55    | 35   | 20        | 87       | 124                 | 102                | 89                 | 76                     | 89             | 868    |                    |
|                                                     | Producer's Accuracy                          |          | 98%           | 92%   | 100% | 100%      | 100%     | 97%                 | 98%                | 90%                | 92%                    | 96%            | 93%    |                    |

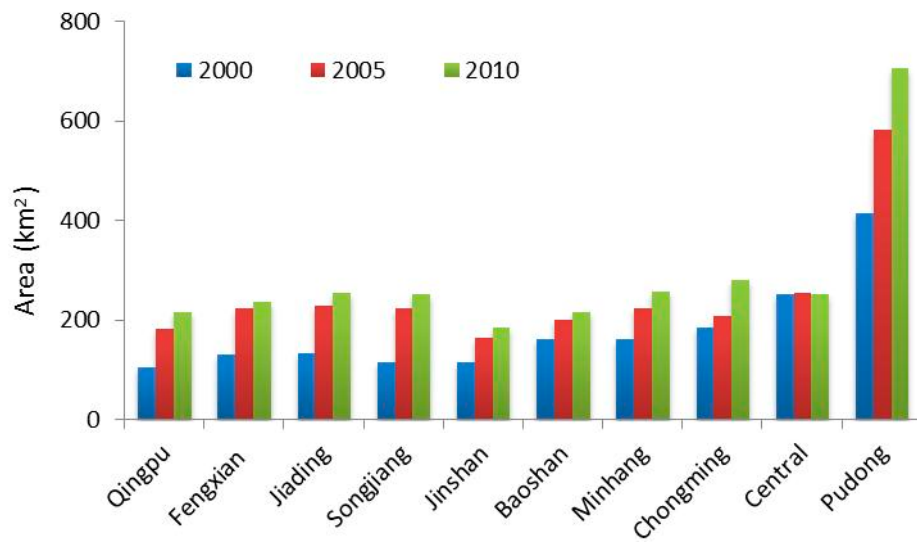

**Figure S1.** Urban expansion (km<sup>2</sup>) in 10 census sub-areas of Shanghai in 2000, 2005 and 2010.

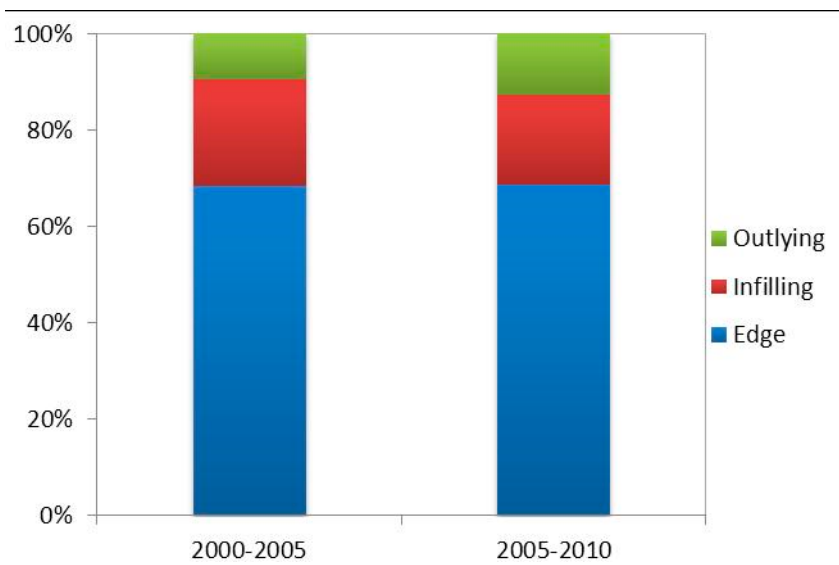

**Figure S2.** Nature of urban expansion (outfilling, infilling, edge) in Shanghai in the sub-periods 2000–2005 and 2005–2010.
